# Supplementary material
Source: PubMed Central journal article supplement (PMC7553016)
Supplement: pt0c00021_si_001.pdf [file pt0c00021_si_001.pdf]

## SUPPORTING INFORMATION

### Modulation of CXCR4-mediated Gi1 activation by EGF receptor and GRK2

Maria Neves <sup>1,2</sup>, Cristina Perpiñá-Viciano <sup>3,4</sup>, Petronila Penela <sup>1,2,5</sup>, Carsten Hoffmann <sup>3,4</sup> and Federico Mayor Jr <sup>1,2,5,\*</sup>

<sup>1</sup> Departamento de Biología Molecular and Centro de Biología Molecular Severo Ochoa (CSIC/UAM), 28049 Madrid, Spain; <sup>2</sup> Instituto de Investigación Sanitaria La Princesa, 28006 Madrid, Spain; <sup>3</sup> Institute of Pharmacology and Toxicology, University of Würzburg, Versbacher Str. 9, 97078, Würzburg, Germany; <sup>4</sup> Institute for Molecular Cell Biology, CMB-Center for Molecular Biomedicine, University Hospital Jena, Friedrich-Schiller University Jena, Hans-Knöll-Strasse 2, 07745, Jena, Germany; <sup>5</sup> CIBER de Enfermedades Cardiovasculares (CIBERCV), Instituto de Salud Carlos III (ISCIII), 28029 Madrid, Spain

\* Corresponding author. Contact information:

Centro de Biología Molecular “Severo Ochoa”, C/ Nicolás Cabrera 1, Universidad Autónoma de Madrid, 28049 Madrid, Spain. Email: [fmayor@cbm.csic.es](mailto:fmayor@cbm.csic.es)

### SUPPORTING INFORMATION TABLE OF CONTENTS

**Figure S1.** CXCL12, EGF or combination of both ligands do not activate Gi1 in the absence of overexpressed receptors.

**Figure S2.** EGF at endogenous levels of EGFR expression does not affect activation of Gi2 or Gi3 by CXCR4 in response to increasing concentrations of CXCL12.

**Figure S3.** Expression levels of 3HA-CXCR4, GRK2 constructs and Flag-EGFR in HEK293 cells.

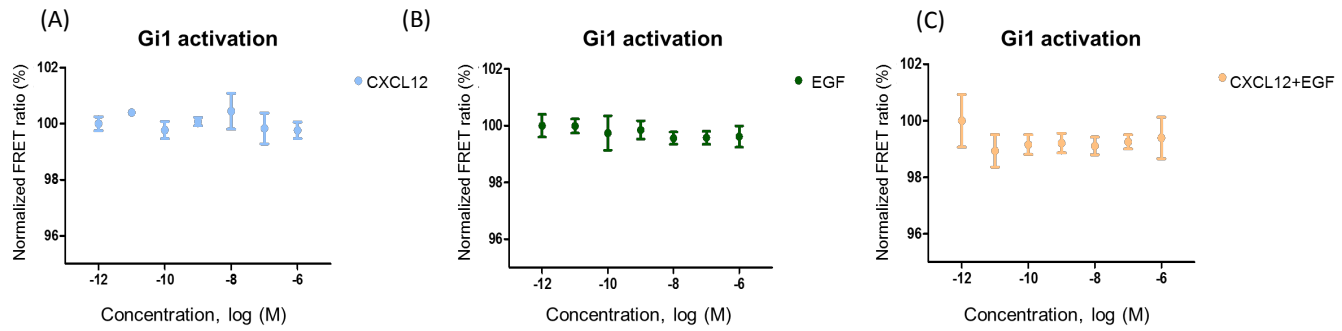

**Figure S1.** *CXCL12, EGF or combination of both ligands does not activate  $G_i1$  in the absence of overexpressed receptors.* Normalized FRET ratio/dose response curves were obtained as detailed in Methods in HEK293 cells expressing the  $G_i$  sensor. Cells were challenged with 0.001nM to 1 $\mu$ M of EGF (A), CXCL12 (B) or the indicated combinations of CXCL12 and EGF (C). Data are mean  $\pm$  SEM of quadruplicate determinations in FRET assays.

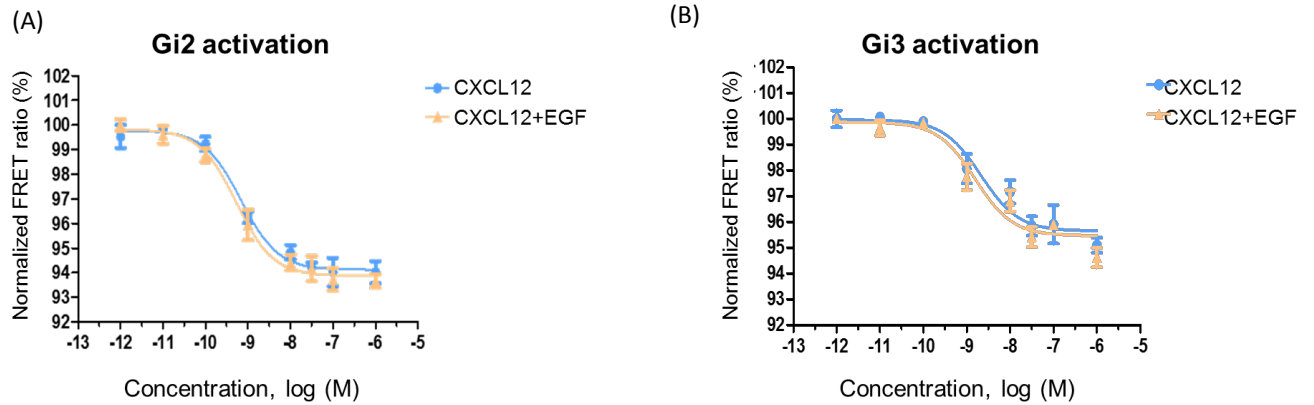

**Figure S2.** *EGF at endogenous levels of EGFR expression does not affect activation of Gi2 or Gi3 by CXCR4 in response to increasing concentrations of CXCL12.* Normalized FRET ratio/dose response curves were obtained as detailed in Methods in HEK293 cells expressing CXCR4 and either the Gi2 or Gi3 sensor and challenged with 0.001nM to 1 $\mu$ M of CXCL12 or both CXCL12 and EGF (0.001nM to 1 $\mu$ M, same concentration of each ligand). Data are mean  $\pm$  SEM of quadruplicate determinations in paired FRET assays. In this particular experiment, EC50 values were 0.68 nM (CXCL12) and 0.53 nM (CXCL12+EGF condition) (panel A, Gi2), and 2.1 nM (CXCL12) and 12 nM (CXCL12+EGF condition) (panel B, Gi3).

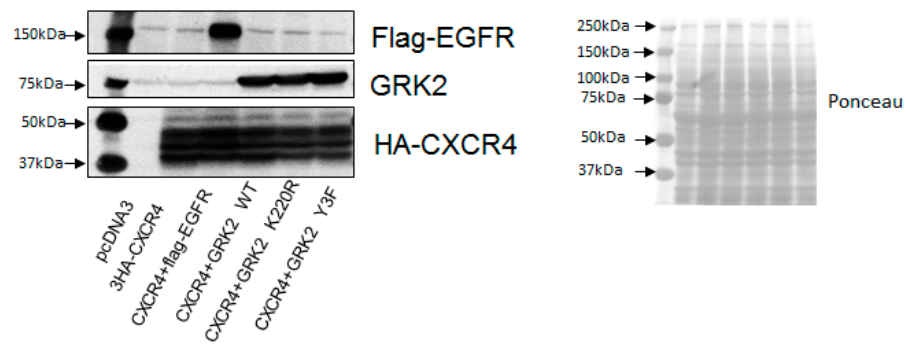

**Figure S3.** *Expression levels of 3HA-CXCR4, GRK2 constructs and Flag-EGFR in HEK293 cells.* Lysates (20  $\mu$ g) from HEK293 cells expressing Gi sensors and either a control vector (pcDNA) or the indicated combinations of 3HA-tagged CXCR4, Flag-tagged EGFR or different GRK2 constructs were analyzed with the appropriate tag or protein antibodies as detailed in Methods. Ponceau staining was used as loading control. A representative blot is shown.
